# Supplementary material
Source: MDPI journal article supplement (https://www.mdpi.com/2071-1050/14/16/9975)
Supplement: s1 [file s1]

## Questionnaire used during the interviews

N.B.: This questionnaire has been translated from French to English. The questions below were not necessarily asked to all the interviewees. Indeed, the questionnaire was adapted according to the profiles of interviewees. However, questions on constraints and/or obstacles to the implementation and sustainability of NBS in the city were always asked. The question on levers was also asked of everyone except for the last interview, which focused more on the Écoquartier approach.

### Personal information:

First name:    Last name:    Gender:    Level of studies:    Field of study:    Structure:    Position:

How long have you held this position?

What does your work consist of?

Do you have other jobs related to Nature-based Solutions?

Can you tell me about the different research/work you have done on the urban environment?

### Green and Blue Solutions (or Nature-based Solutions) in Urban Areas:

Are you familiar with the term Green and Blue Solutions? If so, can you define it?

How do you define Nature-based Solutions (NBS)?

What types of NBS are you working on in the urban environment?

Where are these NBS located geographically?

What is in the environment of these NBS in general?

What are the substrates (or soils) conventionally used in these NBS? Are they adapted according to the plants they will host? If so, what kind of substrates for what plants?

### Biodiversity and ecosystem functions of SVB:

What plants are conventionally planted (or sown) in these NBS?

What are the plant species that spontaneously establish themselves?

What are the species that become established over time?

What are the main functions performed by the substrates and plants used in NBS?

Do you know of any species or substrates that promote water retention?

Do you know of any species that have significant maximum leaf transpiration or cooling power?

Do you know how to maximize, enhance and protect local plant and/or animal biodiversity through NBS?

Do you know the species of birds that frequent the different NBS in cities?

Do you know the insects that frequent the different NBS in cities?

Have you ever heard of supplementation? What do you think about it?

Are these soil/vegetation complexes coupled with other systems or infrastructures to optimize their functions?

Are the sustainability of these functions and the maintenance of these complexes taken into account during their implementation?

#### Constraints, objectives, barriers and levers for the implementation and sustainability of NBS:

What are the external constraints that may influence the selection and implementation of NBS?

What are the possible constraints in terms of soil characteristics?

Are there any soil constraints with respect to water infiltration?

Do you use (see) different species in urban NBS depending on the local climate?

Do you use (see) local species? Are they related to the "Végétal local" brand?

Are you trying to work with species that might cope with climate change?

What are the possible constraints in terms of technical feasibility?

What are the possible constraints in terms of land use?

What are the possible constraints in relation to the Local Urban Plan?

What are the constraints of building rules?

What are the constraints of possible certifications or labels?

What are the environmental objectives related to NBS that urban projects can or should meet (for stormwater management, storms, biodiversity, for example)?

To which label(s) or certification(s) can the NBS implementation contribute? And how (qualitative and quantitative criteria)?

In your opinion, what could be the obstacles to the implementation and sustainability of NBS in cities? Why is the use of NBS not more systematic?

In your opinion, why is the surrounding biodiversity not taken into account more often?

What are the levers that could be used to promote the establishment and sustainability of NBS in cities?

#### Perspectives:

What do you think would be most relevant to implement from a conceptual and technical standpoint?

What would you recommend to move towards a more ideal city?

Do you have any scientific literature or grey sources to recommend on the subject?

Would you have any contacts to recommend for future interviews?

Do you have anything to add?
